# Supplementary material
Source: publisher figshare collection journal article supplement (https://tandf.figshare.com/articles/dataset/_/7393133)
Supplement: Supplementary file 1 [file 1]

# Supplementary Material for “Partition Weighted Approach for Estimating the Marginal Posterior Density with Applications”

Yu-Bo Wang<sup>\*</sup>, Ming-Hui Chen<sup>†</sup>, Lynn Kuo<sup>†</sup>, and Paul O Lewis<sup>‡</sup>

<sup>\*</sup>Department of Mathematical Sciences, Clemson University

<sup>†</sup>Department of Statistics, University of Connecticut

<sup>‡</sup>Department of Ecology and Evolutionary Biology, University of Connecticut

September 6, 2018

## Appendix A: Proof of Theorem 3.1

Using the Cauchy-Schwarz inequality, we have

$$1 = \left( \int_{\tilde{\Theta}_{\boldsymbol{\xi}}} \frac{w(\boldsymbol{\theta}|\boldsymbol{\xi})}{\sqrt{q(\boldsymbol{\theta}, \boldsymbol{\xi})}} \sqrt{q(\boldsymbol{\theta}, \boldsymbol{\xi})} d\boldsymbol{\theta} \right)^2 \leq \int_{\tilde{\Theta}_{\boldsymbol{\xi}}} \frac{w^2(\boldsymbol{\theta}|\boldsymbol{\xi})}{q(\boldsymbol{\theta}, \boldsymbol{\xi})} d\boldsymbol{\theta} \int_{\tilde{\Theta}_{\boldsymbol{\xi}}} q(\boldsymbol{\theta}, \boldsymbol{\xi}) d\boldsymbol{\theta}.$$

Subsequently, we obtain

$$\begin{aligned} \frac{1}{\int_{\tilde{\Theta}_{\boldsymbol{\xi}}} q(\boldsymbol{\theta}, \boldsymbol{\xi}) d\boldsymbol{\theta}} &\leq \int_{\tilde{\Theta}_{\boldsymbol{\xi}}} \frac{w^2(\boldsymbol{\theta}|\boldsymbol{\xi})}{q(\boldsymbol{\theta}, \boldsymbol{\xi})} d\boldsymbol{\theta} \\ \Rightarrow \int \left[ q(\boldsymbol{\theta}_0, \boldsymbol{\xi}) \pi(\boldsymbol{\theta}_0, \boldsymbol{\xi}|D) \frac{1}{\int_{\tilde{\Theta}_{\boldsymbol{\xi}}} q(\boldsymbol{\theta}, \boldsymbol{\xi}) d\boldsymbol{\theta}} \right] d\boldsymbol{\xi} &\leq \int \left[ q(\boldsymbol{\theta}_0, \boldsymbol{\xi}) \pi(\boldsymbol{\theta}_0, \boldsymbol{\xi}|D) \int_{\tilde{\Theta}_{\boldsymbol{\xi}}} \frac{w^2(\boldsymbol{\theta}|\boldsymbol{\xi})}{q(\boldsymbol{\theta}, \boldsymbol{\xi})} d\boldsymbol{\theta} \right] d\boldsymbol{\xi} \\ \Rightarrow \text{Var}_{w_{\text{opt}}} \{ \hat{\pi}_t(\boldsymbol{\theta}_0|D) \} &\leq \text{Var}_w \{ \hat{\pi}_t(\boldsymbol{\theta}_0|D) \}, \end{aligned}$$

which completes the proof.

## Appendix B: An Additional Table

S1. Sensitivity analysis of the conditional working parameter space when setting  $r =$

$$\sqrt{\chi^2_{3,0.5}}.$$

|       | $\log \pi_{t_3}(0, 0, 0) = -3.911$ |       |       | $\log \pi_{t_3}(1, 0, 0) = -4.326$ |       |       |
|-------|------------------------------------|-------|-------|------------------------------------|-------|-------|
| PWMDE | Mean                               | MCSE  | RMSE  | Mean                               | MCSE  | RMSE  |
| K=5   | -3.911                             | 0.010 | 0.010 | -4.325                             | 0.010 | 0.010 |
| K=10  | -3.911                             | 0.010 | 0.010 | -4.325                             | 0.009 | 0.009 |
| K=15  | -3.911                             | 0.010 | 0.010 | -4.325                             | 0.009 | 0.009 |
| K=20  | -3.911                             | 0.010 | 0.010 | -4.325                             | 0.009 | 0.009 |
|       | $\log \pi_{t_3}(0, 1, 0) = -4.421$ |       |       | $\log \pi_{t_3}(0, 0, 1) = -4.326$ |       |       |
| PWMDE | Mean                               | MCSE  | RMSE  | Mean                               | MCSE  | RMSE  |
| K=5   | -4.420                             | 0.010 | 0.010 | -4.325                             | 0.011 | 0.011 |
| K=10  | -4.421                             | 0.009 | 0.009 | -4.325                             | 0.011 | 0.011 |
| K=15  | -4.421                             | 0.009 | 0.009 | -4.325                             | 0.011 | 0.011 |
| K=20  | -4.421                             | 0.009 | 0.009 | -4.325                             | 0.010 | 0.010 |
